# Supplementary material
Source: publisher figshare collection journal article supplement (https://tandf.figshare.com/ndownloader/files/16702214)
Supplement: Supplementary file 1 [file 16702214]

**Bacterial Insights into the Formation of Opaline Stromatolites from the Chimalacatepec Lava Tube System, Mexico**

Maira N. Luis-Vargasa, Rafael A. López-Martíneza, Alfredo R. Vilchis-Nestorb, Raquel Dazaa and Rocio J. Alcántara-Hernándezb*

*aInstituto de Geología, Universidad Nacional Autónoma de México, Ciudad de México, México; bCentro Conjunto de Investigación de Química Sustentable, Universidad Autónoma del Estado de México, Toluca, México.*

*Corresponding author: Rocio J. Alcántara-Hernández. Instituto de Geología, Universidad Nacional Autónoma de México, Ciudad Universitaria, Av. Universidad 3000, Del. Coyoacan, 04510, Mexico City, Mexico, E-mail: [ralcantarah@geologia.unam.mx](mailto:ralcantarah@geologia.unam.mx), [rocio.alcantara.h@gmail.com](mailto:rocio.alcantara.h@gmail.com)


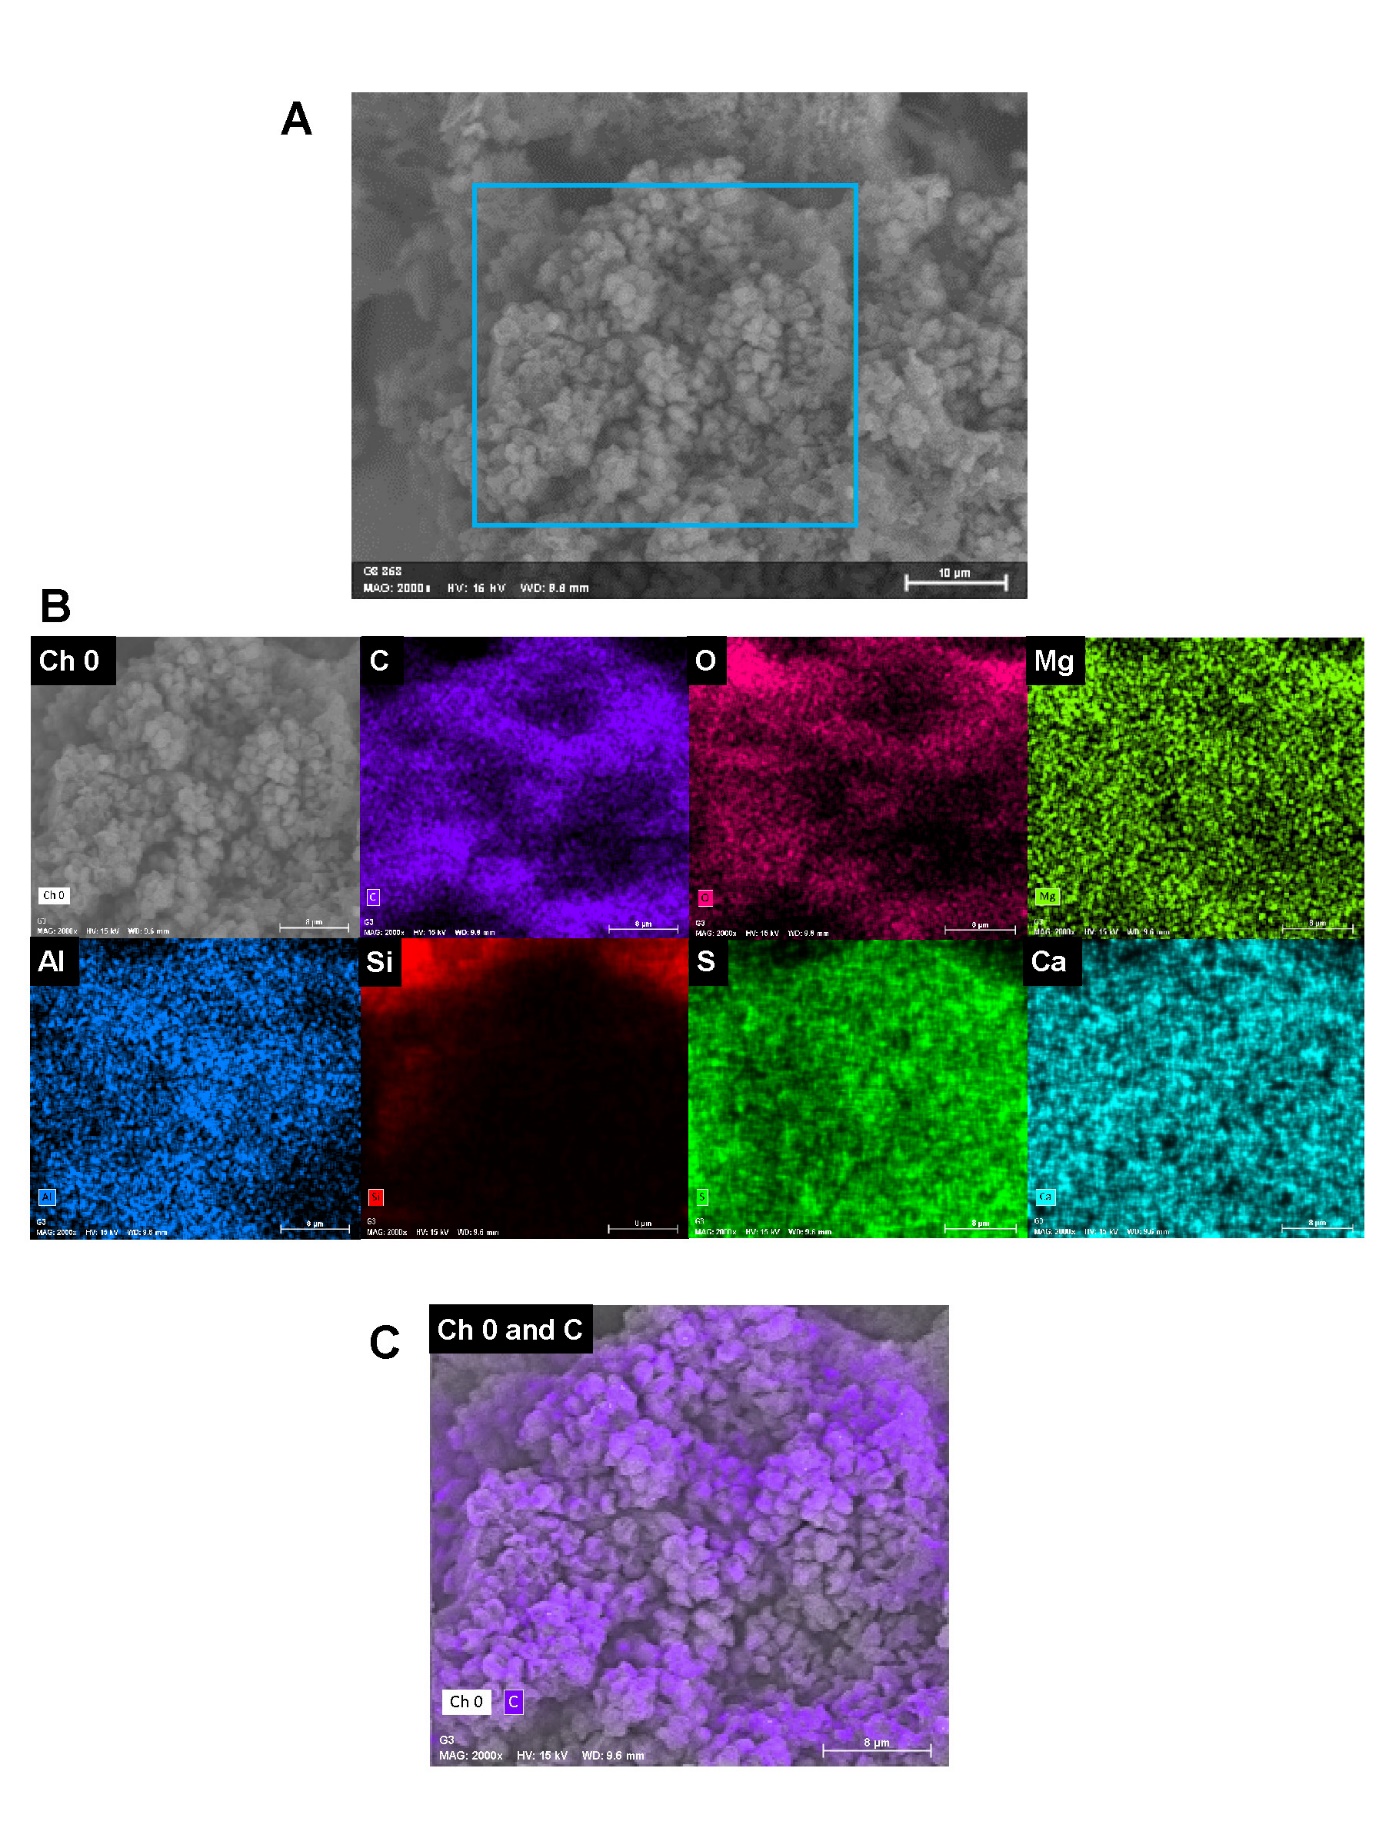


Figure S1. EDS elemental mapping of a representative microbial cluster in a siliceous stromatolite. A. SEM image. B. The corresponding elemental mapping of C, O, Mg, Al, Si, S, and Ca, respectively. C. Merge-image of the SEM micrograph and the EDS mapping of the carbon.


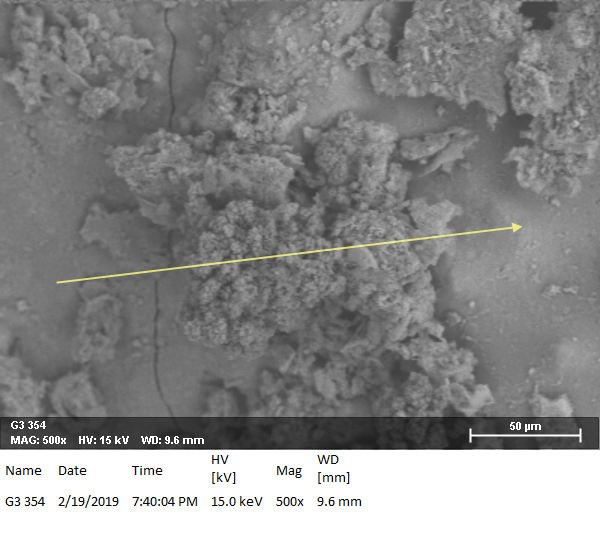

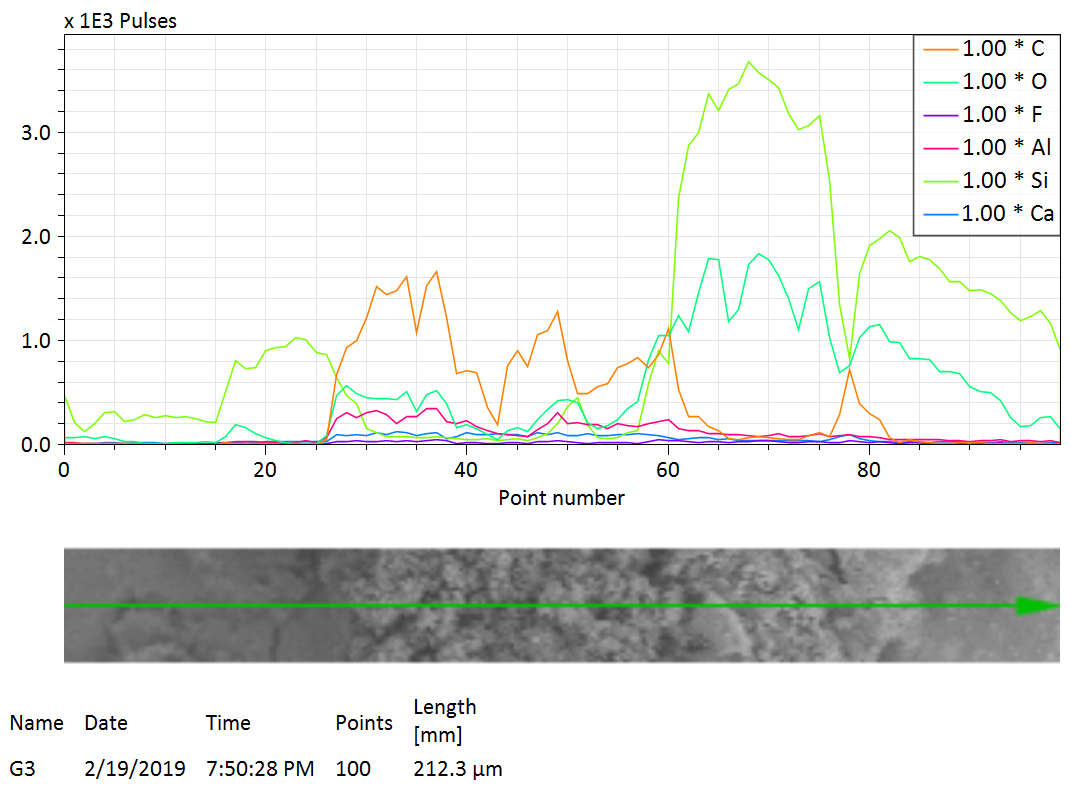


Figure S2. SEM micrograph with EDS linescan along the yellow arrow (upper image) of a microbial cluster within a siliceous stromatolite. The cluster is surrounded by a siliceous (Si-O) matrix, while the cluster display shows a higher content of C, as can be observed in the plot where the carbon concentration profile is enlarged when the microbial cluster is scanned.
